# Supplementary material for: Gestational Weight Gain by Maternal Pre-pregnancy BMI and Childhood Problem Behaviours in School-Age Years: A Pooled Analysis of Two European Birth Cohorts
Source: PubMed Central journal article supplement (PMC7476966; doi:10.1007/s10995-020-02962-y), 2020-06-17
Supplement: 10995_2020_2962_MOESM1_ESM.pdf [file 10995_2020_2962_MOESM1_ESM.pdf]

## Electronic Supplementary Material

Gestational weight gain by maternal pre-pregnancy BMI and childhood problem behaviours in school-age years: a pooled analysis of two European birth cohorts

Maternal and Child Health Journal

Non-response analyses

Table 2A: Included and excluded participants' characteristics, MEFAB

|                                            | Included                |                                    | Excluded      |                                    | p-value       |       |
|--------------------------------------------|-------------------------|------------------------------------|---------------|------------------------------------|---------------|-------|
|                                            | n                       | n (%) or mean (SD) or median (IQR) | n             | n (%) or mean (SD) or median (IQR) |               |       |
| <b>Maternal characteristics</b>            |                         |                                    |               |                                    |               |       |
| Age at delivery (years)                    | 378                     | 29.56 (3.97)                       | 901           | 29.18 (4.42)                       | 0.148         |       |
| Ancestry (% Caucasian)                     | 377                     | 373 (98.94%)                       | 884           | 860 (97.29%)                       | 0.068         |       |
| Pre-pregnancy BMI (kg/m <sup>2</sup> )     | 378                     | 22.90 (21.49, 25.23)               | 810           | 23.46 (21.22, 26.30)               | 0.030         |       |
| Pre-pregnancy BMI (% Overweight/obese)     | 378                     | 103 (27.25%)                       | 810           | 277 (34.20%)                       | 0.017         |       |
| Smoking during pregnancy (% ever smokers)  | 376                     | 94 (25.00%)                        | 884           | 234 (26.47%)                       | 0.586         |       |
| Alcohol during pregnancy (% ever drinkers) | 376                     | 13 (3.46%)                         | 884           | 22 (2.49%)                         | 0.338         |       |
| Parity                                     | 378                     |                                    | 894           |                                    | 0.985         |       |
|                                            |                         | <i>First born</i>                  |               | 664 (74.27%)                       |               |       |
|                                            |                         | <i>Second born</i>                 |               | 183 (20.47%)                       |               |       |
|                                            |                         | <i>Third + born</i>                |               | 47 (5.26%)                         |               |       |
| Level of education                         | 263                     |                                    | 33            |                                    | 0.012         |       |
|                                            |                         | <i>Low</i>                         |               | 4 (12.12%)                         |               |       |
|                                            |                         | <i>Middle</i>                      |               | 22 (66.67%)                        |               |       |
|                                            |                         | <i>High</i>                        |               | 7 (21.21%)                         |               |       |
| Weight in pregnancy (kg)                   |                         |                                    |               |                                    |               |       |
|                                            | <i>First trimester</i>  | 378                                | 65.53 (10.94) | 868                                | 66.85 (12.59) | 0.077 |
|                                            | <i>Second trimester</i> | 377                                | 69.47 (10.79) | 872                                | 70.97 (12.58) | 0.043 |
|                                            | <i>Third trimester</i>  | 376                                | 73.67 (10.80) | 863                                | 75.48 (12.82) | 0.017 |
|                                            | <i>At delivery</i>      | 375                                | 76.89 (11.28) | 873                                | 78.55 (13.14) | 0.033 |
| Caesarean section (% yes)                  | 376                     | 30 (7.98%)                         | 891           | 123 (13.80%)                       | 0.004         |       |
| Gestational diabetes mellitus (% yes)      | 376                     | 5 (1.33%)                          | 881           | 30 (3.41%)                         | 0.041         |       |
| <b>Children's characteristics</b>          |                         |                                    |               |                                    |               |       |
| Gestational age (weeks)                    | 378                     | 39.85 (1.61)                       | 828           | 39.81 (2.56)                       | 0.807         |       |
| Birth weight (g)                           | 377                     | 3304.09 (520.98)                   | 892           | 3205.14 (583.27)                   | 0.005         |       |
| Sex (% male)                               | 378                     | 205 (54.23%)                       | 896           | 492 (54.91%)                       | 0.824         |       |
| Breastfeeding (% ever breastfed)           | 268                     | 125 (46.64%)                       | 20            | 9 (45.00%)                         | 0.887         |       |

Table 2B: Included and excluded participants' characteristics, Rhea

|                                            | Included |                                    | Excluded |                                    | p-value |               |       |
|--------------------------------------------|----------|------------------------------------|----------|------------------------------------|---------|---------------|-------|
|                                            | n        | n (%) or mean (SD) or median (IQR) | n        | n (%) or mean (SD) or median (IQR) |         |               |       |
| <b>Maternal characteristics</b>            |          |                                    |          |                                    |         |               |       |
| Age at delivery (years)                    | 413      | 30.02 (4.68)                       | 1057     | 29.10 (5.22)                       | 0.002   |               |       |
| Nationality (% Greek)                      | 410      | 393 (95.85%)                       | 1071     | 956 (89.26%)                       | <0.001  |               |       |
| Pre-pregnancy BMI (kg/m <sup>2</sup> )     | 414      | 23.61 (21.67, 26.72)               | 959      | 23.18 (20.81, 26.13)               | 0.006   |               |       |
| Pre-pregnancy BMI (% Overweight/obese)     | 414      | 152 (36.71%)                       | 959      | 312 (32.53%)                       | 0.133   |               |       |
| Smoking during pregnancy (% ever smokers)  | 371      | 65 (17.52%)                        | 869      | 198 (22.78%)                       | 0.038   |               |       |
| Alcohol during pregnancy (% ever drinkers) | 361      | 101 (27.98%)                       | 759      | 216 (28.46%)                       | 0.867   |               |       |
| Parity                                     | 408      |                                    | 990      |                                    | 0.123   |               |       |
|                                            |          | <i>First born</i>                  |          | 412 (41.62%)                       |         |               |       |
|                                            |          | <i>Second born</i>                 |          | 372 (37.58%)                       |         |               |       |
|                                            |          | <i>Third + born</i>                |          | 206 (20.81%)                       |         |               |       |
| Level of education                         | 414      |                                    | 991      |                                    | <0.001  |               |       |
|                                            |          | <i>Low</i>                         |          | 181 (18.26%)                       |         |               |       |
|                                            |          | <i>Middle</i>                      |          | 505 (50.96%)                       |         |               |       |
|                                            |          | <i>High</i>                        |          | 305 (30.78%)                       |         |               |       |
| Weight in pregnancy (kg)                   |          |                                    |          |                                    |         |               |       |
|                                            |          | <i>First trimester</i>             | 342      | 67.49 (13.58)                      | 793     | 67.11 (13.90) | 0.672 |
|                                            |          | <i>Second trimester</i>            | -        | -                                  | -       | -             |       |
|                                            |          | <i>Third trimester</i>             | 362      | 77.58 (13.70)                      | 817     | 75.80 (12.71) | 0.031 |
|                                            |          | <i>At delivery</i>                 | 377      | 78.29 (13.00)                      | 929     | 76.63 (12.82) | 0.035 |
| Caesarean section (% yes)                  | 413      | 205 (49.64%)                       | 1076     | 561 (52.14%)                       | 0.387   |               |       |
| Gestational diabetes mellitus (% yes)      | 379      | 43 (11.35%)                        | 828      | 101 (12.20%)                       | 0.672   |               |       |
| <b>Children's characteristics</b>          |          |                                    |          |                                    |         |               |       |
| Gestational age (weeks)                    | 411      | 38.16 (1.59)                       | 1063     | 38.12 (1.77)                       | 0.672   |               |       |
| Birth weight (g)                           | 409      | 3213.18 (453.36)                   | 1015     | 3121.06 (488.82)                   | 0.001   |               |       |
| Sex (% male)                               | 414      | 232 (56.04%)                       | 1108     | 535 (48.29%)                       | 0.007   |               |       |
| Breastfeeding (% ever breastfed)           | 401      | 344 (85.79%)                       | 891      | 746 (83.73%)                       | 0.346   |               |       |
