# Supplementary material for: Gestational Weight Gain by Maternal Pre-pregnancy BMI and Childhood Problem Behaviours in School-Age Years: A Pooled Analysis of Two European Birth Cohorts
Source: PubMed Central journal article supplement (PMC7476966; doi:10.1007/s10995-020-02962-y), 2020-06-17
Supplement: 10995_2020_2962_MOESM4_ESM.pdf [file 10995_2020_2962_MOESM4_ESM.pdf]

## Electronic Supplementary Material

Gestational weight gain by maternal pre-pregnancy BMI and childhood problem behaviours in school-age years: a pooled analysis of two European birth cohorts

Maternal and Child Health Journal

Population characteristics by category of problem behaviour scales

Problem behaviour scales were categorised into normal development (score lower than 63) and clinical range (score over or equal to 63).

Table 4A: Population's characteristics subdivided by category of total problems

|                                                       | MEFAB                         |                                |               | Rhea                          |                                |         |
|-------------------------------------------------------|-------------------------------|--------------------------------|---------------|-------------------------------|--------------------------------|---------|
|                                                       | Normal development<br>(n=310) | Clinical development<br>(n=68) | p-value       | Normal development<br>(n=368) | Clinical development<br>(n=46) | p-value |
| <b>Maternal characteristics</b>                       |                               |                                |               |                               |                                |         |
| Age at delivery (years)                               | 29.91 (3.91)                  | 27.96 (3.88)                   | <0.001        | 30.14 (4.64)                  | 29.11 (4.93)                   | 0.161   |
| Ancestry/Nationality (% Caucasian/Greek) <sup>b</sup> | 305 (98.71%)                  | 68 (100%)                      | 0.346         | 350 (95.11%)                  | 43 (93.48%)                    | 0.635   |
| Pre-pregnancy BMI (kg/m <sup>2</sup> ) <sup>a</sup>   | 23.51 (3.49)                  | 24.31 (4.59)                   | 0.105         | 24.88 (5.16)                  | 25.32 (4.79)                   | 0.577   |
| Smoking during pregnancy (% ever smokers)             | 66 (21.43%)                   | 28 (41.18%)                    | 0.001         | 57 (17.38%)                   | 8 (18.60%)                     | 0.842   |
| Alcohol during pregnancy (% ever drinkers)            | 11 (3.57%)                    | 2 (2.94%)                      | 0.797         | 88 (27.33%)                   | 13 (33.33%)                    | 0.430   |
| Parity                                                |                               |                                | 0.165         |                               |                                | 0.583   |
|                                                       | <i>No children</i>            | 225 (72.58%)                   | 56 (82.35%)   | 163 (45.03%)                  | 22 (47.83%)                    |         |
|                                                       | <i>One child</i>              | 67 (21.61%)                    | 11 (16.18%)   | 138 (38.12%)                  | 19 (41.30%)                    |         |
|                                                       | <i>Two or more children</i>   | 18 (5.81%)                     | 1 (1.47%)     | 61 (16.85%)                   | 5 (10.87%)                     |         |
| Level of education                                    |                               |                                | 0.024         |                               |                                | 0.038   |
|                                                       | <i>Low</i>                    | 48 (22.12%)                    | 19 (41.30%)   | 27 (7.34%)                    | 6 (13.04%)                     |         |
|                                                       | <i>Middle</i>                 | 89 (41.01%)                    | 15 (32.61%)   | 184 (50.00%)                  | 29 (63.04%)                    |         |
|                                                       | <i>High</i>                   | 80 (36.87%)                    | 12 (26.09%)   | 157 (42.66%)                  | 11 (23.91%)                    |         |
| Weight in pregnancy (kg)                              |                               |                                |               |                               |                                |         |
|                                                       | <i>First trimester</i>        | 64.98 (10.33)                  | 68.01 (13.16) | 66.99 (13.36)                 | 71.74 (14.90)                  | 0.047   |
|                                                       | <i>Second trimester</i>       | 68.94 (10.23)                  | 71.86 (12.86) | -                             | -                              | -       |
|                                                       | <i>Third trimester</i>        | 73.23 (10.36)                  | 75.69 (12.51) | 77.22 (13.63)                 | 80.39 (14.12)                  | 0.064   |
|                                                       | <i>At delivery</i>            | 76.29 (10.70)                  | 79.61 (13.35) | 77.75 (12.76)                 | 82.95 (14.25)                  | 0.018   |
| Caesarean section (% yes)                             | 24 (7.79%)                    | 6 (8.82%)                      | 0.776         | 181 (49.32%)                  | 24 (52.17%)                    | 0.715   |
| Gestational diabetes mellitus (% yes)                 | 4 (1.29%)                     | 0 (0.00%)                      | 0.346         | 4 (1.10%)                     | 4 (8.89%)                      | <0.001  |

Table 4A (continued)

|                                    | MEFAB                         |                                |         | Rhea                          |                                |         |
|------------------------------------|-------------------------------|--------------------------------|---------|-------------------------------|--------------------------------|---------|
|                                    | Normal development<br>(n=310) | Clinical development<br>(n=68) | p-value | Normal development<br>(n=368) | Clinical development<br>(n=46) | p-value |
| <b>Children's characteristics</b>  |                               |                                |         |                               |                                |         |
| Gestational age (weeks)            | 39.84 (1.61)                  | 39.89 (1.63)                   | 0.823   | 38.17 (1.54)                  | 38.02 (1.99)                   | 0.539   |
| Birth weight (g)                   | 3308.17 (518.62)              | 3285.52 (535.07)               | 0.746   | 3223.83 (448.63)              | 3129.13 (486.10)               | 0.182   |
| Sex (% male)                       | 165 (53.23%)                  | 40 (58.82%)                    | 0.401   | 200 (54.35%)                  | 32 (69.57%)                    | 0.050   |
| Breastfeeding (% ever breastfed)   | 103 (46.82%)                  | 22 (45.83%)                    | 0.901   | 308 (86.03%)                  | 36 (83.72%)                    | 0.682   |
| Day-care attendance (% yes)        | 187 (83.48%)                  | 34 (73.91%)                    | 0.125   | 71 (19.29%)                   | 13 (28.89%)                    | 0.131   |
| Age at survey (years)              | 7.28 (0.25)                   | 7.28 (0.30)                    | 0.947   | 6.56 (0.28)                   | 6.62 (0.29)                    | 0.240   |
| BMI at survey (kg/m <sup>2</sup> ) | 15.60 (1.83)                  | 15.78 (1.77)                   | 0.533   | 16.91 (2.64)                  | 18.06 (3.11)                   | 0.007   |

Table 4B: Population's characteristics subdivided by category of internalizing behaviours

|                                                       | MEFAB                         |                                |         | Rhea                          |                                |         |
|-------------------------------------------------------|-------------------------------|--------------------------------|---------|-------------------------------|--------------------------------|---------|
|                                                       | Normal development<br>(n=321) | Clinical development<br>(n=57) | p-value | Normal development<br>(n=365) | Clinical development<br>(n=49) | p-value |
| <b>Maternal characteristics</b>                       |                               |                                |         |                               |                                |         |
| Age at delivery (years)                               | 29.71 (3.97)                  | 28.69 (3.89)                   | 0.074   | 30.09 (4.61)                  | 29.50 (5.23)                   | 0.412   |
| Ancestry/Nationality (% Caucasian/Greek) <sup>b</sup> | 316 (98.75%)                  | 57 (100%)                      | 0.396   | 345 (94.52%)                  | 48 (97.96%)                    | 0.303   |
| Pre-pregnancy BMI (kg/m <sup>2</sup> ) <sup>a</sup>   | 23.74 (3.80)                  | 23.17 (3.24)                   | 0.289   | 24.93 (5.27)                  | 24.93 (3.83)                   | 0.997   |
| Smoking during pregnancy (% ever smokers)             | 75 (23.51%)                   | 19 (33.33%)                    | 0.115   | 58 (17.79%)                   | 7 (15.56%)                     | 0.771   |
| Alcohol during pregnancy (% ever drinkers)            | 11 (3.45%)                    | 2 (3.51%)                      | 0.982   | 88 (27.59%)                   | 13 (33.95%)                    | 0.648   |
| Parity                                                |                               |                                | 0.432   |                               |                                | 0.713   |
| <i>No children</i>                                    | 236 (73.52%)                  | 45 (78.95%)                    |         | 162 (45.00%)                  | 23 (47.92%)                    |         |
| <i>One child</i>                                      | 67 (20.87%)                   | 11 (19.30%)                    |         | 141 (39.17%)                  | 16 (33.33%)                    |         |
| <i>Two or more children</i>                           | 18 (5.61%)                    | 1 (1.75%)                      |         | 57 (15.83%)                   | 9 (18.75%)                     |         |
| Level of education                                    |                               |                                | 0.451   |                               |                                | 0.102   |
| <i>Low</i>                                            | 54 (24.11%)                   | 13 (33.33%)                    |         | 28 (7.67%)                    | 5 (10.20%)                     |         |
| <i>Middle</i>                                         | 91 (40.62%)                   | 13 (33.33%)                    |         | 182 (49.86%)                  | 31 (63.27%)                    |         |
| <i>High</i>                                           | 79 (35.27%)                   | 13 (33.33%)                    |         | 155 (42.47%)                  | 13 (26.53%)                    |         |
| Weight in pregnancy (kg)                              |                               |                                |         |                               |                                |         |
| <i>First trimester</i>                                | 65.60 (11.10)                 | 65.10 (10.02)                  | 0.749   | 67.28 (13.67)                 | 69.09 (12.93)                  | 0.429   |
| <i>Second trimester</i>                               | 69.50 (10.88)                 | 69.27 (10.41)                  | 0.880   | -                             | -                              | -       |
| <i>Third trimester</i>                                | 73.72 (10.81)                 | 73.37 (10.83)                  | 0.475   | 77.65 (13.88)                 | 77.13 (12.53)                  | 0.814   |
| <i>At delivery</i>                                    | 76.87 (11.29)                 | 76.98 (11.36)                  | 0.947   | 78.12 (12.80)                 | 79.63 (14.56)                  | 0.475   |
| Caesarean section (% yes)                             | 27 (8.46%)                    | 3 (5.26%)                      | 0.411   | 180 (49.45%)                  | 25 (51.02%)                    | 0.837   |
| Gestational diabetes mellitus (% yes)                 | 4 (1.25%)                     | 0 (0.00%)                      | 0.397   | 6 (1.68%)                     | 2 (4.08%)                      | 0.255   |

Table 4B (continued)

|                                    | MEFAB                         |                                |         | Rhea                          |                                |         |
|------------------------------------|-------------------------------|--------------------------------|---------|-------------------------------|--------------------------------|---------|
|                                    | Normal development<br>(n=321) | Clinical development<br>(n=57) | p-value | Normal development<br>(n=365) | Clinical development<br>(n=49) | p-value |
| <b>Children's characteristics</b>  |                               |                                |         |                               |                                |         |
| Gestational age (weeks)            | 39.81 (1.66)                  | 40.08 (1.33)                   | 0.242   | 38.17 (1.56)                  | 38.10 (1.84)                   | 0.803   |
| Birth weight (g)                   | 3289.25 (527.00)              | 3387.37 (481.69)               | 0.191   | 3204.42 (440.49)              | 3277.55 (539.48)               | 0.290   |
| Sex (% male)                       | 175 (54.52%)                  | 30 (52.63%)                    | 0.792   | 190 (52.05%)                  | 42 (85.71%)                    | <0.001  |
| Breastfeeding (% ever breastfed)   | 108 (47.37%)                  | 17 (42.50%)                    | 0.569   | 303 (85.59%)                  | 41 (87.23%)                    | 0.762   |
| Day-care attendance (% yes)        | 189 (82.17%)                  | 32 (80.00%)                    | 0.742   | 72 (19.73%)                   | 12 (25.00%)                    | 0.393   |
| Age at survey (years)              | 7.27 (0.25)                   | 7.34 (0.30)                    | 0.129   | 6.56 (0.28)                   | 6.64 (0.30)                    | 0.061   |
| BMI at survey (kg/m <sup>2</sup> ) | 15.56 (1.74)                  | 16.03 (2.20)                   | 0.106   | 16.91 (2.48)                  | 17.98 (4.00)                   | 0.010   |

Table 4C: Population's characteristics subdivided by category of externalizing behaviours

|                                                       | MEFAB                         |                                |         | Rhea                          |                                |         |
|-------------------------------------------------------|-------------------------------|--------------------------------|---------|-------------------------------|--------------------------------|---------|
|                                                       | Normal development<br>(n=325) | Clinical development<br>(n=53) | p-value | Normal development<br>(n=357) | Clinical development<br>(n=57) | p-value |
| <b>Maternal characteristics</b>                       |                               |                                |         |                               |                                |         |
| Age at delivery (years)                               | 29.78 (3.91)                  | 28.19 (4.11)                   | 0.007   | 30.19 (4.71)                  | 28.98 (4.35)                   | 0.071   |
| Ancestry/Nationality (% Caucasian/Greek) <sup>b</sup> | 320 (98.77%)                  | 53 (100%)                      | 0.416   | 340 (95.24%)                  | 53 (92.98%)                    | 0.471   |
| Pre-pregnancy BMI (kg/m <sup>2</sup> ) <sup>a</sup>   | 23.50 (3.50)                  | 24.56 (4.80)                   | 0.054   | 24.95 (5.11)                  | 24.77 (5.19)                   | 0.798   |
| Smoking during pregnancy (% ever smokers)             | 75 (23.22%)                   | 19 (35.85%)                    | 0.049   | 53 (16.61%)                   | 12 (23.08%)                    | 0.256   |
| Alcohol during pregnancy (% ever drinkers)            | 12 (3.72%)                    | 1 (1.89%)                      | 0.500   | 83 (26.27%)                   | 18 (40.00%)                    | 0.055   |
| Parity                                                |                               |                                | 0.512   |                               |                                | 0.396   |
| <i>No children</i>                                    | 241 (74.15%)                  | 40 (75.47%)                    |         | 158 (45.01%)                  | 27 (47.37%)                    |         |
| <i>One child</i>                                      | 66 (20.31%)                   | 12 (22.64%)                    |         | 139 (39.60%)                  | 18 (31.58%)                    |         |
| <i>Two or more children</i>                           | 18 (5.54%)                    | 1 (1.89%)                      |         | 54 (15.38%)                   | 12 (21.05%)                    |         |
| Level of education                                    |                               |                                | 0.058   |                               |                                | 0.327   |
| <i>Low</i>                                            | 54 (23.18%)                   | 13 (43.33%)                    |         | 28 (7.84%)                    | 5 (8.77%)                      |         |
| <i>Middle</i>                                         | 95 (40.77%)                   | 9 (30.00%)                     |         | 179 (50.14%)                  | 34 (59.65%)                    |         |
| <i>High</i>                                           | 84 (36.05%)                   | 8 (26.67%)                     |         | 150 (42.02%)                  | 18 (31.58%)                    |         |
| Weight in pregnancy (kg)                              |                               |                                |         |                               |                                |         |
| <i>First trimester</i>                                | 65.04 (10.36)                 | 68.55 (13.68)                  | 0.030   | 67.13 (13.32)                 | 69.86 (15.12)                  | 0.210   |
| <i>Second trimester</i>                               | 69.03 (10.30)                 | 72.16 (13.23)                  | 0.050   | -                             | -                              | -       |
| <i>Third trimester</i>                                | 73.34 (10.44)                 | 75.71 (12.76)                  | 0.143   | 77.37 (13.68)                 | 78.91 (13.88)                  | 0.461   |
| <i>At delivery</i>                                    | 76.47 (10.78)                 | 79.45 (13.82)                  | 0.075   | 77.91 (12.93)                 | 80.71 (13.26)                  | 0.154   |
| Caesarean section (% yes)                             | 26 (8.05%)                    | 4 (7.55%)                      | 0.900   | 178 (50.00%)                  | 27 (47.37%)                    | 0.712   |
| Gestational diabetes mellitus (% yes)                 | 4 (1.23%)                     | 0 (0.00%)                      | 0.417   | 6 (1.70%)                     | 2 (3.64%)                      | 0.337   |

Table 4C (continued)

|                                    | MEFAB                         |                                |         | Rhea                          |                                |         |
|------------------------------------|-------------------------------|--------------------------------|---------|-------------------------------|--------------------------------|---------|
|                                    | Normal development<br>(n=325) | Clinical development<br>(n=53) | p-value | Normal development<br>(n=357) | Clinical development<br>(n=57) | p-value |
| <b>Children's characteristics</b>  |                               |                                |         |                               |                                |         |
| Gestational age (weeks)            | 39.83 (1.62)                  | 39.96 (1.58)                   | 0.593   | 38.12 (1.58)                  | 38.40 (1.70)                   | 0.211   |
| Birth weight (g)                   | 3300.88 (504.59)              | 3323.68 (616.90)               | 0.768   | 3214.32 (449.56)              | 3205.98 (480.78)               | 0.898   |
| Sex (% male)                       | 176 (54.15%)                  | 29 (54.72%)                    | 0.939   | 193 (54.06%)                  | 39 (68.42%)                    | 0.043   |
| Breastfeeding (% ever breastfed)   | 124 (52.54%)                  | 19 (59.38%)                    | 0.467   | 298 (85.88%)                  | 46 (85.19%)                    | 0.892   |
| Day-care attendance (% yes)        | 200 (83.33%)                  | 21 (70.00%)                    | 0.074   | 66 (18.54%)                   | 18 (31.58%)                    | 0.023   |
| Age at survey (years)              | 7.27 (0.26)                   | 7.32 (0.30)                    | 0.337   | 6.56 (0.28)                   | 6.62 (0.32)                    | 0.135   |
| BMI at survey (kg/m <sup>2</sup> ) | 15.62 (1.86)                  | 15.67 (1.56)                   | 0.889   | 17.07 (2.79)                  | 16.83 (2.18)                   | 0.525   |
