# Supplementary material for: Gestational Weight Gain by Maternal Pre-pregnancy BMI and Childhood Problem Behaviours in School-Age Years: A Pooled Analysis of Two European Birth Cohorts
Source: PubMed Central journal article supplement (PMC7476966; doi:10.1007/s10995-020-02962-y), 2020-06-17
Supplement: 10995_2020_2962_MOESM6_ESM.pdf [file 10995_2020_2962_MOESM6_ESM.pdf]

## Electronic Supplementary Material

Gestational weight gain by maternal pre-pregnancy BMI and childhood problem behaviours in school-age years: a pooled analysis of two European birth cohorts

Maternal and Child Health Journal

Sensitivity analyses

Table 10: Results of sensitivity analyses (outcome: total problems)

| Sensitivity analyses                                           | Stratification group                                            | wGWG estimates               |                               | Predicted scores (SE) range <sup>a</sup> |                              |
|----------------------------------------------------------------|-----------------------------------------------------------------|------------------------------|-------------------------------|------------------------------------------|------------------------------|
| 1. Gestational age >36 complete weeks                          | Normal BMI, males                                               | 80.55<br>(-41.11, 202.21)    | -94.45<br>(-230.04, 41.14)    | 51.15 (1.72)<br>51.09 (1.52)             |                              |
|                                                                | Normal BMI, females                                             | 0.02<br>(-0.07, 0.10)        | -2.70<br>(-24.37, 18.96)      | 49.79 (1.44)<br>49.41 (1.44)             |                              |
|                                                                | Overweight                                                      | 112.87*<br>(25.00, 200.74)   | 210.53*<br>(35.43, 385.62)    | 38.61 (5.66)<br>69.00 (6.66)             |                              |
| 2. Complete gestational weight data                            | Normal BMI, males                                               | 102.26§<br>(-3.54, 208.06)   | -108.00<br>(-228.25, 12.25)   | 49.01 (1.60)<br>51.91 (1.54)             |                              |
|                                                                | Normal BMI, females                                             | 0.01<br>(-0.07, 0.09)        | -5.95<br>(-28.07, 16.16)      | 50.19 (1.50)<br>49.03 (1.48)             |                              |
|                                                                | Overweight                                                      | 95.60*<br>(9.01, 182.20)     | 187.66*<br>(13.77, 361.56)    | 39.78 (5.89)<br>67.51 (6.89)             |                              |
| 3. Analyses by cohort                                          | MEFAB, Normal BMI, males                                        | 132.30*<br>(19.27, 245.32)   | -141.05*<br>(-269.23, -12.87) | 47.12 (1.87)<br>50.80 (1.94)             |                              |
|                                                                | MEFAB, Normal BMI, females                                      | 0.01<br>(-0.08, 0.11)        | -5.27<br>(-31.68, 21.13)      | 50.42 (1.90)<br>49.26 (2.19)             |                              |
|                                                                | MEFAB, Overweight/Obese                                         | 98.07<br>(-9.20, 205.34)     | 196.18<br>(-24.83, 417.20)    | 36.06 (9.32)<br>74.04 (11.71)            |                              |
|                                                                | Rhea, Normal BMI, males                                         | -86.64<br>(-525.09, 351.81)  | 68.84<br>(-428.11, 565.78)    | 55.47 (1.99)<br>51.60 (1.97)             |                              |
|                                                                | Rhea, Normal BMI, females                                       | -0.84<br>(-7.47, 5.80)       | -14.12<br>(-231.92, 203.68)   | 50.69 (10.17)<br>46.40 (12.30)           |                              |
|                                                                | Rhea, Overweight/Obese                                          | 39.51<br>(-375.21, 454.22)   | 114.07<br>(-523.72, 751.85)   | 48.64 (13.60)<br>56.49 (15.17)           |                              |
|                                                                | 4. Additional control for breastfeeding and day-care attendance | Normal BMI, males            | 103.62*<br>(-0.14, 207.37)    | -114.86§<br>(-232.76, 3.04)              | 49.77 (1.53)<br>51.78 (1.27) |
|                                                                |                                                                 | Normal BMI, females          | 0.02<br>(-0.07, 0.10)         | -6.51<br>(-28.15, 15.14)                 | 50.02 (1.42)<br>48.82 (1.42) |
|                                                                |                                                                 | Overweight/obese             | 90.81*<br>(7.00, 174.62)      | 183.11*<br>(16.50, 349.72)               | 40.82 (5.39)<br>66.26 (6.33) |
| 5. Analyses excluding underweight and obese women              | Normal BMI, males                                               | 99.96<br>(-9.87, 209.79)     | -107.62<br>(-234.00, 18.75)   | 49.69 (1.50)<br>52.33 (1.26)             |                              |
|                                                                | Normal BMI, females                                             | 0.01<br>(-0.07, 0.10)        | -3.77<br>(-25.57, 18.03)      | 49.68 (1.46)<br>49.02 (1.44)             |                              |
|                                                                | Overweight                                                      | 112.30*<br>(8.13, 216.48)    | 280.10**<br>(75.50, 484.70)   | 35.93 (6.39)<br>70.24 (7.56)             |                              |
| 6. Complete-case analyses                                      | Normal BMI, males                                               | 93.37<br>(-28.29, 215.03)    | -93.75<br>(-233.63, 46.14)    | 49.14 (1.76)<br>53.03 (1.51)             |                              |
|                                                                | Normal BMI, females                                             | 0.19<br>(-0.16, 0.55)        | 14.23<br>(-14.38, 42.83)      | 46.49 (2.16)<br>51.75 (2.78)             |                              |
|                                                                | Overweight/obese                                                | 128.38*<br>(8.44, 248.33)    | 202.78<br>(-15.62, 421.19)    | 39.14 (6.74)<br>68.17 (7.93)             |                              |
| 7. Additional control for Mediterranean diet score (Rhea only) | Normal BMI, males                                               | -138.83<br>(-584.74, 307.07) | 126.83<br>(-378.27, 631.94)   | 55.80 (2.01)<br>51.63 (1.96)             |                              |
|                                                                | Normal BMI, females                                             | -0.75<br>(-7.39, 5.90)       | -11.55<br>(-229.73, 206.64)   | 50.43 (10.18)<br>46.71 (12.32)           |                              |
|                                                                | Overweight/obese                                                | 51.05<br>(-372.11, 474.21)   | 136.07<br>(-517.90, 790.04)   | 47.80 (13.91)<br>57.43 (15.52)           |                              |

Note: a: values refer to predicted scores for the 5<sup>th</sup> and 95<sup>th</sup> percentiles of wGWG; all models were adjusted for maternal first trimester (MEFAB) or pre-pregnancy (Rhea) weight, maternal age at delivery, smoking and alcohol consumption during pregnancy, parent's level of education, parity, children's age at assessment and cohort. Children's sex was additionally controlled for in non-stratified models.

§: p<0.06; \*: p<0.05; \*\*: p<0.01

Table 11: Results of sensitivity analyses (outcome: internalizing behaviour)

| Sensitivity analyses                                           | Stratification group                                            | wGWG estimates               |                               | Predicted scores (SE) range <sup>a</sup> |                              |
|----------------------------------------------------------------|-----------------------------------------------------------------|------------------------------|-------------------------------|------------------------------------------|------------------------------|
| 1. Gestational age >36 complete weeks                          | Normal BMI, males                                               | -15.23<br>(-59.26, 28.79)    | -10.67<br>(-34.95, 13.62)     | 63.94 (13.59)<br>41.44 (15.46)           |                              |
|                                                                | Normal BMI, females                                             | 26.84<br>(-42.97, 96.65)     | 95.81<br>(-67.81, 259.43)     | 44.73 (4.75)<br>55.07 (5.67)             |                              |
|                                                                | Overweight                                                      | 117.27**<br>(32.82, 201.72)  | 219.76*<br>(51.27, 388.25)    | 37.75 (5.45)<br>69.41 (6.41)             |                              |
| 2. Complete gestational weight data                            | Normal BMI, males                                               | -8.54<br>(-36.84, 19.75)     | -8.68<br>(-22.90, 5.55)       | 60.82 (8.72)<br>44.40 (9.74)             |                              |
|                                                                | Normal BMI, females                                             | 90.05*<br>(9.66, 170.55)     | 158.57§<br>(-2.97, 320.11)    | 40.85 (5.47)<br>65.54 (6.40)             |                              |
|                                                                | Overweight                                                      | 90.05*<br>(9.66, 170.44)     | 158.57<br>(-2.97, 320.11)     | 40.85 (5.47)<br>65.54 (6.40)             |                              |
| 3. Analyses by cohort                                          | MEFAB, Normal BMI, males                                        | -9.88<br>(-40.54, 20.77)     | -9.84<br>(-25.03, 5.36)       | 62.71 (10.30)<br>42.03 (11.51)           |                              |
|                                                                | MEFAB, Normal BMI, females                                      | 25.44<br>(-55.11, 106.00)    | 87.16<br>(-108.14, 282.45)    | 44.62 (6.55)<br>55.63 (7.55)             |                              |
|                                                                | MEFAB, Overweight/Obese                                         | 89.84§<br>(-0.47, 180.15)    | 153.32<br>(-32.69, 339.33)    | 38.47 (7.85)<br>70.73 (9.86)             |                              |
|                                                                | Rhea, Normal BMI, males                                         | -61.53<br>(-206.30, 83.24)   | -28.33<br>(-112.14, 55.48)    | 71.12 (23.36)<br>34.62 (24.89)           |                              |
|                                                                | Rhea, Normal BMI, females                                       | -243.00<br>(-837.75, 351.75) | -438.74<br>(-1616.58, 739.10) | 63.44 (18.86)<br>32.85 (20.63)           |                              |
|                                                                | Rhea, Overweight/Obese                                          | -126.88<br>(-565.07, 311.32) | -99.71<br>(-773.64, 574.22)   | 58.31 (14.37)<br>45.15 (16.03)           |                              |
|                                                                | 4. Additional control for breastfeeding and day-care attendance | Normal BMI, males            | -14.97<br>(-42.35, 12.42)     | -10.96<br>(-24.80, 2.88)                 | 63.53 (8.04)<br>41.30 (8.86) |
|                                                                |                                                                 | Normal BMI, females          | 28.54<br>(-40.27, 97.35)      | 109.62<br>(-52.38, 271.62)               | 44.11 (4.66)<br>55.62 (5.59) |
| Overweight/obese                                               |                                                                 | 95.77*<br>(16.43, 175.10)    | 182.70*<br>(24.90, 340.50)    | 40.27 (5.11)<br>66.31 (5.99)             |                              |
| 5. Analyses excluding underweight and obese women              | Normal BMI, males                                               | -10.34<br>(-39.63, 18.95)    | -9.32<br>(-23.96, 5.30)       | 60.99 (8.22)<br>44.35 (8.97)             |                              |
|                                                                | Normal BMI, females                                             | 22.04<br>(-47.72, 91.80)     | 84.73<br>(-79.49, 248.94)     | 45.24 (4.75)<br>54.19 (5.71)             |                              |
|                                                                | Overweight                                                      | 115.79*<br>(14.56, 217.02)   | 267.80**<br>(68.66, 466.94)   | 35.89 (6.21)<br>69.73 (7.35)             |                              |
| 6. Complete-case analyses                                      | Normal BMI, males                                               | -9.69<br>(-40.33, 20.95)     | -9.34<br>(-24.45, 5.76)       | 61.19 (8.90)<br>44.21 (9.73)             |                              |
|                                                                | Normal BMI, females                                             | 42.53<br>(-30.90, 115.96)    | 108.12<br>(-67.49, 283.73)    | 42.81 (5.03)<br>56.10 (6.02)             |                              |
|                                                                | Overweight/obese                                                | 132.19*<br>(18.13, 246.24)   | 207.29*<br>(-0.39, 414.98)    | 38.13 (6.41)<br>67.92 (7.54)             |                              |
| 7. Additional control for Mediterranean diet score (Rhea only) | Normal BMI, males                                               | -44.29<br>(-190.98, 102.41)  | -17.74<br>(-102.78, 67.30)    | 65.44 (23.68)<br>40.67 (25.24)           |                              |
|                                                                | Normal BMI, females                                             | -231.86<br>(-828.11, 364.38) | -415.82<br>(-1596.56, 764.93) | 62.72 (18.90)<br>33.63 (20.68)           |                              |
|                                                                | Overweight/obese                                                | -111.37<br>(-559.15, 336.42) | -71.02<br>(-763.20, 621.15)   | 57.20 (14.72)<br>46.39 (16.42)           |                              |

Note: a: values refer to predicted scores for the 5<sup>th</sup> and 95<sup>th</sup> percentiles of wGWG; all models were adjusted for maternal first trimester (MEFAB) or pre-pregnancy (Rhea) weight, maternal age at delivery, smoking and alcohol consumption during pregnancy, parent's level of education, parity, children's age at assessment and cohort. Children's sex was additionally controlled for in non-stratified models.

§: p<0.06; \*: p<0.05; \*\*: p<0.01

Table 12: Results of sensitivity analyses (outcome: externalizing behaviour)

| Sensitivity analyses                                            | Stratification group    | wGWG estimates             |                              | Predicted scores (SE) range <sup>a</sup> |
|-----------------------------------------------------------------|-------------------------|----------------------------|------------------------------|------------------------------------------|
| 1. Gestational age >36 complete weeks                           | Normal BMI              | -27.22*<br>(-54.44, -0.00) | -56.46<br>(-137.11, 24.19)   | 56.32 (2.53)<br>46.57 (3.24)             |
|                                                                 | Overweight/obese        | 71.43<br>(-16.02, 158.89)  | 150.46<br>(-23.87, 324.79)   | 44.74 (5.64)<br>65.28 (6.63)             |
| 2. Complete gestational weight data                             | Normal BMI              | -25.74<br>(-53.07, 1.58)   | -65.79<br>(-145.08, 13.50)   | 56.28 (2.63)<br>45.56 (3.41)             |
|                                                                 | Overweight/obese        | 69.78<br>(-17.71, 157.27)  | 161.36<br>(-14.47, 337.18)   | 43.78 (5.95)<br>65.94 (6.97)             |
| 3. Analyses by cohort                                           | MEFAB, Normal BMI       | -27.71§<br>(-56.36, 0.93)  | -74.24<br>(-157.33, 8.85)    | 56.22 (3.18)<br>41.96 (4.41)             |
|                                                                 | MEFAB, Overweight/obese | 70.42<br>(-36.12, 176.95)  | 168.46<br>(-51.10, 388.01)   | 39.87 (9.26)<br>69.78 (11.63)            |
|                                                                 | Rhea, Normal BMI        | -58.76<br>(-191.73, 74.21) | -116.06<br>(-514.56, 282.43) | 58.48 (6.97)<br>47.69 (7.97)             |
|                                                                 | Rhea, Overweight/obese  | 52.74<br>(-350.92, 456.41) | 92.82<br>(-528.02, 713.66)   | 50.93 (13.24)<br>58.72 (14.15)           |
|                                                                 | Normal BMI              | -28.37*<br>(-55.25, -1.50) | -63.07<br>(-141.36, 15.22)   | 56.47 (2.49)<br>45.87 (3.21)             |
| 4. Additional control for breastfeeding and day-care attendance | Overweight/obese        | 60.59<br>(-21.55, 142.73)  | 140.66<br>(-22.71, 304.03)   | 45.57 (5.29)<br>63.94 (6.21)             |
|                                                                 | Normal BMI              | -23.96<br>(-52.08, 4.35)   | -60.65<br>(-141.26, 19.97)   | 55.93 (2.56)<br>46.67 (3.24)             |
| 5. Analyses excluding underweight and obese women               | Overweight              | 64.09<br>(-37.92, 166.11)  | 186.91<br>(-13.60, 387.41)   | 43.42 (6.26)<br>64.97 (7.41)             |
|                                                                 | Normal BMI              | -12.58<br>(-43.94, 18.77)  | -41.05<br>(-132.14, 50.03)   | 53.95 (2.92)<br>48.25 (3.73)             |
| 6. Complete-case analyses                                       | Overweight/obese        | 97.21<br>(-19.05, 213.47)  | 159.89<br>(-51.81, 371.58)   | 44.05 (6.53)<br>66.48 (7.68)             |
|                                                                 | Normal BMI              | -51.58<br>(-185.43, 82.28) | -92.63<br>(-494.36, 309.10)  | 57.70 (7.02)<br>48.59 (8.03)             |
| 7. Additional control for Mediterranean diet score (Rhea only)  | Overweight/obese        | 87.77<br>(-322.20, 497.74) | 154.79<br>(-479.06, 788.63)  | 48.48 (13.48)<br>61.46 (15.04)           |

Note: a: values refer to predicted scores for the 5<sup>th</sup> and 95<sup>th</sup> percentiles of wGWG; all models were adjusted for maternal first trimester (MEFAB) or pre-pregnancy (Rhea) weight, maternal age at delivery, smoking and alcohol consumption during pregnancy, parent's level of education, parity, children's sex, children's age at assessment and cohort.

§: p<0.06; \*: p<0.05; \*\*: p<0.01

Mediation analyses were performed using the PARAMED command in Stata 14 (1).

This method allows for the computation of the controlled direct effect (CDE), the natural direct effect (NDE), the natural indirect effect (NIE) and the marginal total effect (MTE). CDE measures the expected increase in the outcome as the exposure changes and the mediator is fixed at a pre-specified level.

NDE measures the expected increase in the outcome when the changing the exposure (for example from  $X=0$  to  $X=1$ ) and keeping the mediator constant to the value it would have had if the exposure did not have changed.

NIE measures the expected increase in the outcome when the changing the mediator and keeping the exposure constant.

MTE is the sum of NIE and NDE. It measures the change in the outcome for a change in the exposure, considering also the effect of the mediator and controlling for the average level of the covariates (set at their average level).

Table 13: Results of mediation analyses (outcome: total problems)

| Mediator             | Stratification group | Controlled direct effect (SE) | Natural indirect effect (SE) | Marginal total effect (SE) |
|----------------------|----------------------|-------------------------------|------------------------------|----------------------------|
| Gestational diabetes | Normal BMI           | 16.06 (19.54)                 | -1.05 (1.78)                 | -0.00 (398.34)             |
|                      | Overweight           | 29.72 (17.17)                 | -4.22 (11.92)                | 18.90 (827.08)             |
| Delivery mode        | Normal BMI           | -2.04 (1.84)                  | -0.13 (0.15)                 | 0.37 (17.53)               |
|                      | Overweight           | 22.47 (11.49)*                | -2.74 (4.21)                 | 18.93 (62.13)              |
| Gestational age      | Normal BMI           | -0.12 (1.18)                  | -0.38 (0.26)                 | 0.40 (1.24)                |
|                      | Overweight           | 17.33 (8.33)*                 | 0.00 (0.13)                  | 17.62 (8.04)*              |
| Birthweight          | Normal BMI           | -3.22 (3.37)                  | -0.02 (0.15)                 | -0.81 (1.36)               |
|                      | Overweight           | 9.38 (9.84)                   | 0.08 (1.05)                  | 14.03 (8.27)               |
| Child BMI            | Normal BMI           | 0.03 (1.16)                   | -0.02 (0.09)                 | -0.56 (1.21)               |
|                      | Overweight           | 15.54 (9.82)                  | 0.43 (1.28)                  | 16.85 (8.38)*              |

Note: all models were adjusted for maternal first trimester (MEFAB) or pre-pregnancy (Rhea) weight, maternal age at delivery, smoking and alcohol consumption during pregnancy, parent's level of education, parity, children's sex, children's age at assessment and cohort.

\*:  $p < 0.05$

Table 14: Results of additional mediation analyses in the Rhea cohort (outcome: total problems)

| Mediator           | Stratification group | Controlled direct effect (SE) | Natural indirect effect (SE) | Marginal total effect (SE) |
|--------------------|----------------------|-------------------------------|------------------------------|----------------------------|
| Cord-blood leptin  | Normal BMI           | -108.96 (65.73)               | 4.72 (13.58)                 | -105.01 (66.97)            |
|                    | Overweight           | 16.01 (18.45)                 | -17.01 (16.70)               | 1.75 (22.02)               |
| Leptin at 4 years  | Normal BMI           | -76.09 (55.40)                | 4.13 (13.51)                 | -76.26 (55.47)             |
|                    | Overweight           | 16.28 (19.39)                 | 0.99 (11.79)                 | 19.24 (19.88)              |
| Child TNF $\alpha$ | Normal BMI           | -81.41 (53.10)                | 1.32 (17.58)                 | -83.50 (53.05)             |
|                    | Overweight           | 20.10 (23.50)                 | 0.50 (4.47)                  | 16.74 (23.75)              |

Note: all models were adjusted for maternal pre-pregnancy weight, maternal age at delivery, smoking and alcohol consumption during pregnancy, parent's level of education, parity, children's sex and children's age at assessment.

Table 15: Results of mediation analyses (outcome: internalizing behaviour)

| Mediator             | Stratification group | Controlled direct effect (SE) | Natural indirect effect (SE) | Marginal total effect (SE) |
|----------------------|----------------------|-------------------------------|------------------------------|----------------------------|
| Gestational diabetes | Normal BMI           | 26.48 (18.41)                 | -2.39 (4.98)                 | 0.53 (293.89)              |
|                      | Overweight           | 18.43 (16.32)                 | -1.72 (6.36)                 | 16.05 (327.68)             |
| Delivery mode        | Normal BMI           | -2.60 (1.81)                  | -0.22 (0.21)                 | 0.35 (16.77)               |
|                      | Overweight           | 14.16 (10.84)                 | 0.43 (3.73)                  | 15.34 (13.44)              |
| Gestational age      | Normal BMI           | -0.30 (1.33)                  | -0.42 (0.29)                 | 0.49 (1.42)                |
|                      | Overweight           | 18.26 (7.83)*                 | -0.01 (0.69)                 | 18.10 (7.57)*              |
| Birthweight          | Normal BMI           | -4.63 (3.45)                  | 0.16 (0.25)                  | -1.46 (1.55)               |
|                      | Overweight           | 17.21 (9.38)                  | 0.04 (0.46)                  | 17.80 (7.89)*              |
| Child BMI            | Normal BMI           | -0.39 (1.32)                  | -0.01 (0.03)                 | -1.14 (1.37)               |
|                      | Overweight           | 16.12 (9.27)                  | 0.09 (1.02)                  | 16.72 (7.91)*              |

Note: all models were adjusted for maternal first trimester (MEFAB) or pre-pregnancy (Rhea) weight, maternal age at delivery, smoking and alcohol consumption during pregnancy, parent's level of education, parity, children's sex, children's age at assessment and cohort.

\*:  $p < 0.05$ ; \*\*:  $p < 0.01$

Table 16: Results of additional mediation analyses in the Rhea cohort (outcome: internalizing behaviour)

| Mediator          | Stratification group | Controlled direct effect (SE) | Natural indirect effect (SE) | Marginal total effect (SE) |
|-------------------|----------------------|-------------------------------|------------------------------|----------------------------|
| Cord-blood leptin | Normal BMI           | -69.27 (61.47)                | 1.21 (11.42)                 | -68.58 (62.67)             |
|                   | Overweight           | 12.67 (24.99)                 | 6.39 (15.73)                 | 24.56 (26.36)              |
| Leptin at 4 years | Normal BMI           | -19.37 (49.16)                | 4.05 (13.15)                 | -18.98 (49.33)             |
|                   | Overweight           | 18.62 (17.89)                 | 15.02 (14.35)                | 20.55 (18.25)              |
| Child $TNF\alpha$ | Normal BMI           | -27.75 (47.59)                | 6.81 (16.56)                 | -29.96 (47.54)             |
|                   | Overweight           | -33.76 (57.81)                | -2.37 (19.11)                | -33.60 (59.14)             |

Note: all models were adjusted for maternal pre-pregnancy weight, maternal age at delivery, smoking and alcohol consumption during pregnancy, parent's level of education, parity, children's sex and children's age at assessment.

Table 17: Results of mediation analyses (outcome: externalizing behaviour)

| Mediator             | Stratification group | Controlled direct effect (SE) | Natural indirect effect (SE) | Marginal total effect (SE) |
|----------------------|----------------------|-------------------------------|------------------------------|----------------------------|
| Gestational diabetes | Normal BMI           | -0.83 (16.64)                 | -0.62 (2.77)                 | -1.95 (184.31)             |
|                      | Overweight           | 22.21 (17.03)                 | -1.87 (6.78)                 | 16.30 (371.51)             |
| Delivery mode        | Normal BMI           | 4.99 (6.62)                   | -0.09 (0.53)                 | -0.76 (59.56)              |
|                      | Overweight           | 23.67 (11.22)*                | -4.18 (4.47)                 | 17.81 (95.17)              |
| Gestational age      | Normal BMI           | 1.91 (4.02)                   | 0.01 (0.12)                  | -0.08 (3.48)               |
|                      | Overweight           | 14.95 (8.16)                  | 0.00 (0.44)                  | 14.98 (7.87)               |
| Birthweight          | Normal BMI           | -0.11 (4.13)                  | 0.00 (0.17)                  | -1.89 (3.25)               |
|                      | Overweight           | 5.13 (9.61)                   | 0.10 (1.25)                  | 10.05 (8.08)               |
| Child BMI            | Normal BMI           | -2.47 (3.29)                  | 0.10 (0.55)                  | -1.89 (3.26)               |
|                      | Overweight           | 17.07 (9.58)                  | -0.57 (1.40)                 | 15.97 (8.20)§              |

Note: all models were adjusted for maternal first trimester (MEFAB) or pre-pregnancy (Rhea) weight, maternal age at delivery, smoking and alcohol consumption during pregnancy, parent's level of education, parity, children's sex, children's age at assessment and cohort.

§:  $p < 0.06$ ; \*:  $p < 0.05$

Table 18: Results of additional mediation analyses in the Rhea cohort (outcome: externalizing behaviour)

| Mediator           | Stratification group | Controlled direct effect (SE) | Natural indirect effect (SE) | Marginal total effect (SE) |
|--------------------|----------------------|-------------------------------|------------------------------|----------------------------|
| Cord-blood leptin  | Normal BMI           | 12.54 (12.96)                 | -0.51 (2.38)                 | 12.42 (9.83)               |
|                    | Overweight           | 15.98 (15.57)                 | -9.44 (12.21)                | 6.95 (19.11)               |
| Leptin at 4 years  | Normal BMI           | 10.80 (8.53)                  | -0.99 (1.85)                 | 9.85 (8.53)                |
|                    | Overweight           | 16.00 (18.23)                 | 0.62 (7.38)                  | 17.91 (18.48)              |
| Child TNF $\alpha$ | Normal BMI           | 7.15 (8.01)                   | 0.67 (1.94)                  | 7.99 (7.69)                |
|                    | Overweight           | 19.72 (22.78)                 | 0.61 (5.37)                  | 16.62 (22.95)              |

Note: all models were adjusted for maternal pre-pregnancy weight, maternal age at delivery, smoking and alcohol consumption during pregnancy, parent's level of education, parity, children's sex and children's age at assessment.



References:

1. Emsley R, Liu H. PARAMED: Stata module to perform causal mediation analysis using parametric regression models. *Statistical Software Components*. 2013.
